# Supplementary material for: Enhancing hot electron generation and injection in the near infrared via rational design and controlled synthesis of TiO2–gold nanostructures
Source: Royal Society of Chemistry journal article supplement (doi:10.1039/c8fd00152a), 2018-11-21
Supplement: c8fd00152a1.pdf [file c8fd00152a1.pdf]

## Supplementary Information

### Enhancing Hot Electron Generation and Injection in the Near Infrared via Rational Design and Controlled Synthesis of TiO<sub>2</sub>-gold Nanostructures

Supriya Atta,<sup>a</sup> Fuat E. Celik<sup>b</sup> and Laura Fabris<sup>\*c</sup>

<sup>a</sup> Rutgers University, Department of Chemistry and Chemical Biology, 123 Bevier Road, Piscataway NJ 08854.

<sup>b</sup> Rutgers University, Department of Chemical and Biochemical Engineering, 98 Brett Road, Piscataway NJ 08854.

<sup>c</sup> Rutgers University, Department of Materials Science and Engineering, 607 Taylor Road, Piscataway NJ 08854.

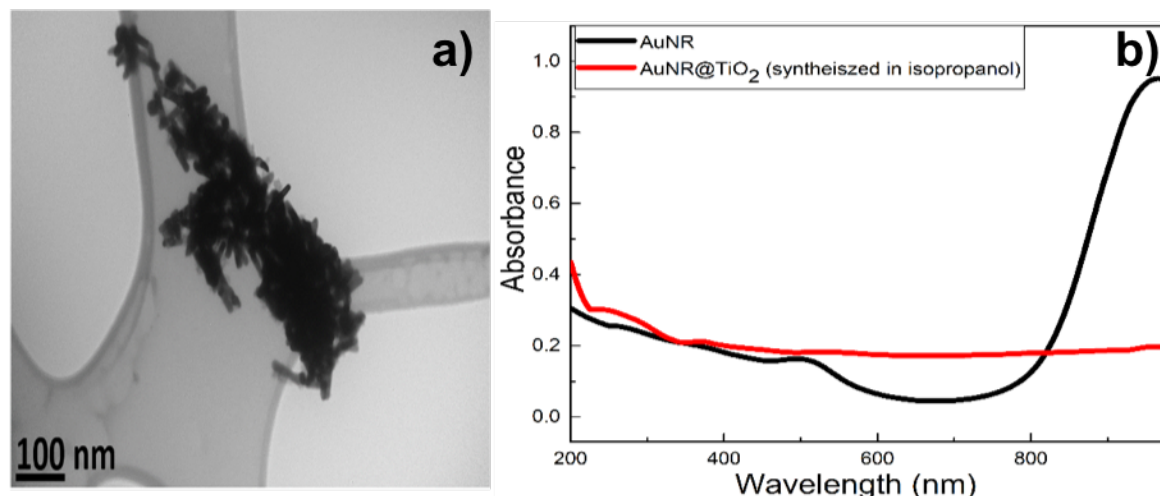

**Figure S1.** a) TEM image of TiO<sub>2</sub> coated gold nanorods synthesized in isopropanol medium where the gold nanorods were aggregated. b) UV-Vis spectrum shows that the longitudinal plasmon band of gold nanorods at around 980 nm was disappeared when the reaction was carried out in isopropanol medium.
